# Supplementary material
Source: PubMed Central journal article supplement (PMC5430404)
Supplement: ml6b00363_si_001.pdf [file ml6b00363_si_001.pdf]

# Similarity- and substructure-based development of $\beta_2$ -adrenergic receptor ligands based on unusual scaffolds

Denis Schmidt<sup>†‡</sup>, Jakub Gunera<sup>†</sup>, Jillian G. Baker<sup>¶</sup> and Peter Kolb<sup>+\*</sup>

<sup>†</sup> Department of Pharmaceutical Chemistry, Philipps-University Marburg, Marbacher Weg 6, 35032 Marburg

<sup>‡</sup> Institute of Pharmaceutical and Medicinal Chemistry, Heinrich-Heine-University Düsseldorf, Universitätsstraße 1, 40225 Düsseldorf

<sup>¶</sup> Cell Signalling, School of Life Sciences, Queen's Medical Centre, University of Nottingham, Nottingham NG7 2UH, UK

\*peter.kolb@uni-marburg.de

## SUPPLEMENTARY PROCEDURES

### Substructure searches

Eight substructure queries (**S1-S8**), which are depicted in Chart S2, were manually derived from the six original hits (Chart S1). These queries were encoded as SMARTS and run against the complete ZINC database (1), which comprised 8.5 million molecules at that time.

### Similarity searches

At the same time, FCFP4 fingerprints, as implemented in Pipeline Pilot, of the six query molecules **Q1-Q6** were used to screen the same database of 8.5 million entries for molecules with a Tanimoto similarity  $\geq 0.45$ .

### Docking

All molecules originating from the two searches were, after removal of duplicates, docked into the orthosteric pocket of the inverse-agonist bound X-ray structure of the  $\beta_2$ AR (PDB 2RH1), as previously described. (2) Briefly, molecules were placed by DOCK, using guiding points inside the pocket that had been derived from carazolol, the inverse agonist bound to the  $\beta_2$ AR in this X-ray structure.

### Cell culture

CHO-K1 cells stably expressing either the human  $\beta_1$ AR or the human  $\beta_2$ AR and CRE-SPAP reporter gene were used (CHO- $\beta_1$ , CHO- $\beta_2$  (3)) and grown in Dulbecco's modified Eagle's medium nutrient mix F12 (DMEM/F12) containing 10% foetal calf serum and 2 mM L-glutamine in a 37°C humidified 5% CO<sub>2</sub>:95% air atmosphere.

### [<sup>3</sup>H](-)-CGP 12177 whole cell binding

Media was removed from confluent cells in white-sided 96-well plated and immediately replaced by 100  $\mu$ L of the ligand under investigation (diluted in serum-free media (sfm), DMEM/F12 containing 2 mM L-glutamine only) followed immediately by 100  $\mu$ L [<sup>3</sup>H](-)-CGP 12177 (in sfm) to give a final [<sup>3</sup>H](-)-CGP 12177 concentration of 0.44-1.12 nM. The plates were incubated for 2 h at 37°C before being washed twice with 200  $\mu$ L 4°C phosphate buffered saline. Microscint 20 (100  $\mu$ L) was added to each well, a white base added to the plate, the plated left for a minimum of 8 h in the dark then counted on a TopCount.

K<sub>D</sub> values were determined from the IC<sub>50</sub> values using the Cheng-Prusoff equation (see ref. (3) for details). For all ligands that completely inhibited specific binding, a pK<sub>D</sub> value is given. For ligands where significant specific binding was inhibited, but the maximum concentration of a ligand was not quite sufficient to completely inhibit specific binding, an apparent pK<sub>D</sub> value is given (based on the assumption that a higher concentration of the competing ligand would inhibit all specific binding). For ligands with less than 50% inhibition of binding, despite maximum concentration of ligand (maximum possible concentration of ligand ranged from 20-100  $\mu$ M), no K<sub>D</sub> value is stated. Propranolol (10  $\mu$ M) was used to determine non-specific binding and the K<sub>D</sub> values for [<sup>3</sup>H](-)-CGP 12177 were 0.42 nM for the human  $\beta_1$ AR and 0.17 nM for the human  $\beta_2$ AR. (3)

## CRE-SPAP production

Confluent cells (96-well plates) were serum starved with sfm for 24 h before experimentation. The media was then removed and replaced with 100  $\mu$ L sfm or sfm containing final concentration of antagonist. Agonist (10  $\mu$ L, diluted in sfm) was then added and the plates incubated for 5 h at 37°C.

CRE-SPAP production was then measured as previously described. (4) The intrinsic efficacy of all ligands was assessed from 7-point concentration response curves. Isoprenaline (10  $\mu$ M) was used as the positive control in all plates. Maximum responses and pEC<sub>50</sub> values were obtained from sigmoidal dose response curves (see ref. (4) for full details). The affinity of antagonists was determined from a rightward shift of the agonist response using the Gaddam equation, and for the partial agonist **3**, using the method of Stephenson (see ref. (4) or full details).

## SUPPLEMENTARY RESULTS

### [<sup>3</sup>H](-)CGP 12177 whole cell binding and CRE-SPAP production validation

[<sup>3</sup>H](-)CGP 12177 whole cell binding demonstrated that the known  $\beta_1$ -selective antagonist CGP 20712A, as expected, had high affinity for the human  $\beta_1$ AR (pK<sub>D</sub> 8.96±0.13, n=4) whilst the known  $\beta_2$ -antagonist ICI 118551 had high affinity for the human  $\beta_2$ AR (pK<sub>D</sub> 9.61±0.05, n=5, Table 1).

Cimaterol stimulated a full agonist response at both receptors. At the  $\beta_1$ AR, this response was 3.3±0.5-fold over basal, 105±2% that of the isoprenaline maximum (n=12) and at the  $\beta_2$ AR, the response was 4.4±0.1-fold over basal and 95±1% that of isoprenaline (n=9) (Table S4). As expected, CGP 20712A inhibited the CHO- $\beta_1$  cimaterol response with high affinity, and ICI 118551 inhibited the CHO- $\beta_2$  cimaterol response with high affinity to yield similar selectivities to those obtained from the binding assay (Table S4).

### Compound **3** acts through the primary catecholamine conformation of $\beta_1$ AR

Compound **3** was clearly a partial agonist at both the  $\beta_1$  and  $\beta_2$ -AR (Table S4, Figure S2a,b). At the  $\beta_2$ AR, this partial agonist response was inhibited by ICI 118551 to give a K<sub>D</sub> value for ICI 118551 very similar to that obtained in the presence of cimaterol (Table S4), confirming that this partial agonist response is indeed occurring through interaction with the  $\beta_2$ AR.

The  $\beta_1$ AR, however, exists in at least two active agonist conformations (4-8): a high affinity catecholamine conformation (through which cimaterol and catecholamines stimulate agonist responses, and for which CGP 20712A and CGP 12177 have high affinities), and a secondary conformation through which higher concentrations of CGP 12177 stimulate agonist responses (although these responses are relatively resistant to antagonism). The conformation through which **3** was stimulating  $\beta_1$  partial agonist response was therefore assessed.

The affinity measured by both the binding assay (pK<sub>D</sub> 9.01) and the functional assay (pK<sub>D</sub> 9.19) were very similar. The concentrations of [<sup>3</sup>H](-)CGP 12177 used in the binding assay would only measure binding to the catecholamine conformation. Compound **3** also inhibited the cimaterol response (known to act through the catecholamine conformation, (4,7) with high affinity, again suggesting high affinity catecholamine conformation interaction. The partial agonist response (pEC<sub>50</sub> 8.80) is also very similar to the pK<sub>D</sub> values, again suggesting interactions with the catecholamine conformation. This therefore suggests that both the binding of **3** and the agonist response obtained in the functional assay are occurring through the same high affinity conformation of the  $\beta_1$ AR.

The partial agonist response of **3** in CHO- $\beta_1$  cells was inhibited by CGP 20712A with high affinity, suggesting that the response is indeed  $\beta_1$ AR-mediated. However, the K<sub>D</sub> value for CGP 20712A obtained was part-way between that of cimaterol (high affinity catecholamine conformation) and that of CGP 12177 (secondary conformation, Table S4). Thus, although the similarity of the K<sub>D</sub> and EC<sub>50</sub> values suggests single-site, high affinity conformation interactions, further evidence for which site of actions the response was occurring through was sought. When increasing concentrations of **3** were added to fixed concentrations of cimaterol (Figure S2e,f), the cimaterol response was inhibited in a manner suggestive of competition at a single conformation (compare with Figure 1 of ref (5); Figure 4 of ref (6); Figure 8 of ref (7) and Figure 6 of ref (4)). Overall therefore, **3** is also a high affinity partial agonist of the human  $\beta_1$ AR, with the agonist response occurring through the primary catecholamine conformation of the receptor.

### Dose response curves of the other ligands

The dose response curve for several compounds showed no stimulation of either receptor (e.g. Figure S3, compound **1**). For some ligands, e.g. **16** and **17**, there was also no inhibition of [<sup>3</sup>H](-)CGP 12177 binding and no shift of the cimaterol-induced concentration response curve. These ligands were therefore found to not be interacting with either the  $\beta_1$ - or  $\beta_2$ AR at concentrations up to the maximum studies (100  $\mu$ M for many). Other compounds, e.g. **1**, although no stimulation occurred in response to the ligands alone, they did inhibit binding and cause a shift of the cimaterol-induced dose response. These compounds are therefore neutral antagonists.

For some compounds, e.g. **10** and **11**, the highest concentrations possible (20  $\mu$ M for **10**, 100  $\mu$ M for **11**) caused a marked fall to below basal (e.g. Figure S3). This pattern of CRE-SPAP production is consistent with toxicity (i.e. cell death, or major assay interference). In these instances, the concentration of compound used to antagonize cimaterol was reduced, until such a time as the reduction in basal was minimal or non-existent (i.e. for **10**, reduced to 2  $\mu$ M as this no longer caused a reduction

in basal). The functional assay is far more sensitive to issues such as toxicity because the cells need to be living in order to generate responses, whereas in the binding assay, binding to the receptors can be measured even if the cells are dead. In some cases, this reduction in compound concentration still allowed a shift to be observed and thus a  $K_D$  value to be measured.

Receptor-mediated inverse agonism as an explanation for the marked fall in CRE-SPAP production is very unlikely as i) this gene transcription assay is relatively poor at detecting inverse agonism, including compound ICI 118551, which is known to be an inverse agonist in these cells; (9) ii) identical results were seen in both  $\beta_1$ - and  $\beta_2$ -cells despite the fact that the ligands e.g. **10** had different affinities for the two receptors (and therefore receptor mediated effects should have been observed at different concentrations); iii) the  $\log IC_{50}$  of the apparent fall in CRE-SPAP production (e.g. for **10**,  $10\mu M$  at the  $\beta_2AR$ ) is not the same as the  $K_D$  value obtained from the binding studies ( $1\mu M$ ), again suggesting the fall is a non-receptor mediated issue and iv) if the fall below basal was due to inverse agonism, there should still be a cimaterol concentration response in the presence of  $20\mu M$  **10**, that was further right shifted, than that at  $2\mu M$  (Figure S1). As can be seen in Figure S4, there is absolutely no cimaterol response in the presence of  $20\mu M$  **10** and the whole response is below basal. This strongly suggests a non-receptor mediated cause for the fall.

#### Novel compounds

As well as a small fall in maximum cimaterol response, **10** causes a rightward shift in the cimaterol concentration response at the  $\beta_2AR$  but not at the  $\beta_1AR$ . This suggests that **10** is indeed interacting with the  $\beta_2AR$  in this functional assay and it is showing some  $\beta_2AR$  selectivity, with an apparent  $K_D$  value that is similar to that obtained from the binding study. The lack of a rightward shift of the cimaterol-concentration response in the presence of  $2\mu M$  **10** at  $\beta_1AR$  are entirely as expected, given the  $K_D$  value obtained from the binding studies ( $3\mu M$ ). Thus, despite the apparent toxicity issues at high concentrations in the functional assay, **10** appears to be a  $\beta_2$ -selective ligand with an affinity of 300-1000 nM in both the binding and functional assay.

SUPPLEMENTARY FIGURES

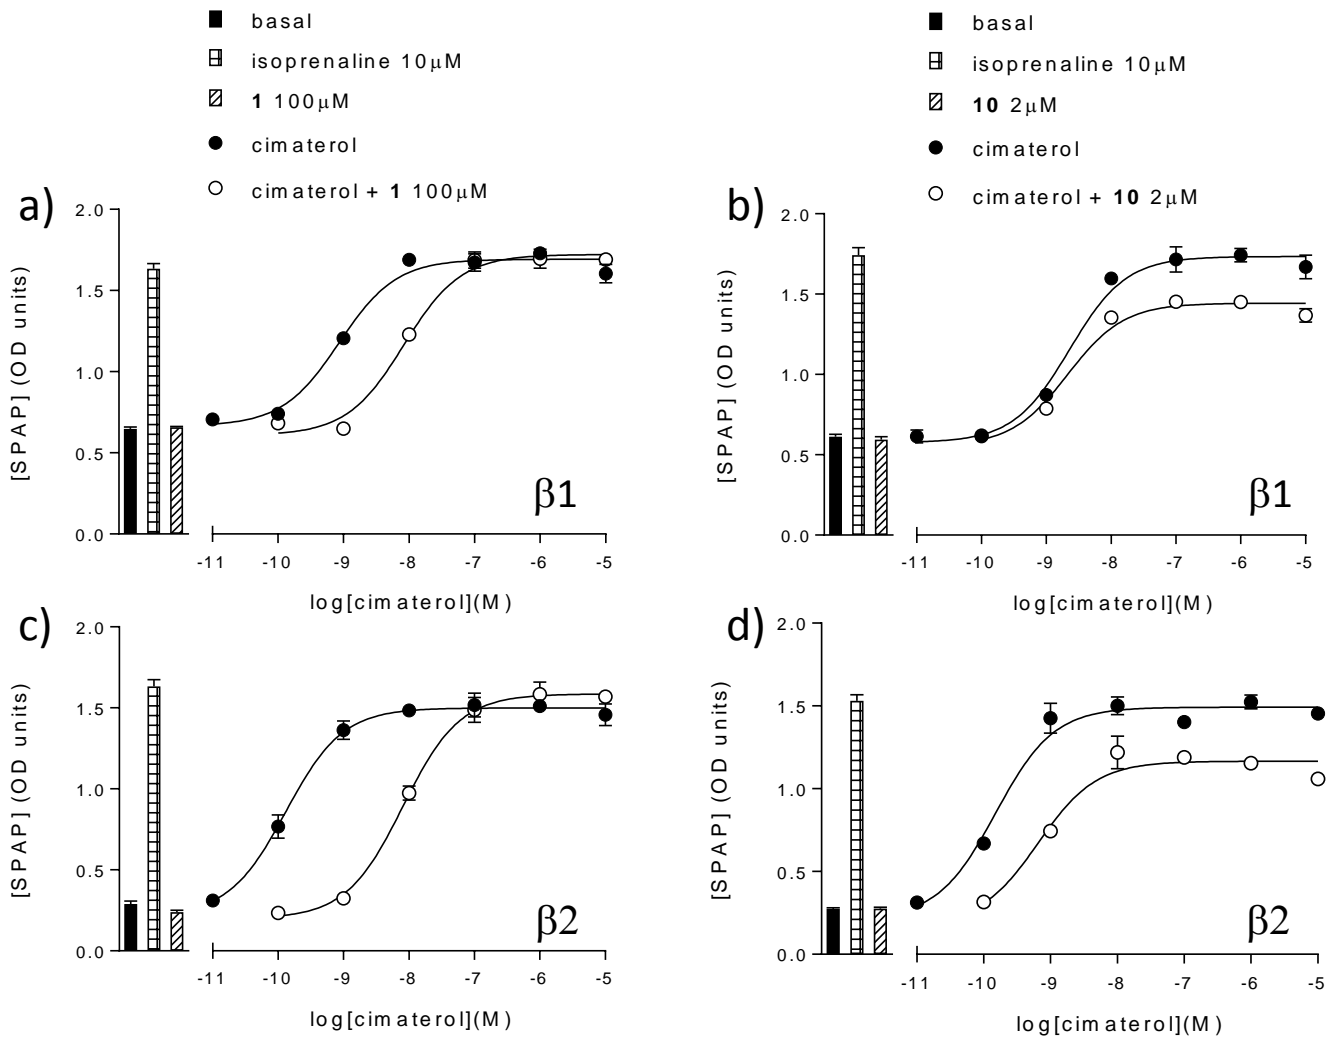

Figure S1: CRE-SPAP production in a) and b) CHO-β1 cells and c) and d) CHO-β2 cells in response to cimaterol in the absence and presence of a) and c) 100 μM **1**, and b) and d) 2 μM **10**. Bars represent basal CRE-SPAP production and that in response to 10 μM isoprenaline and 100 μM **1** or 2 μM **10** alone. Data points are mean ± sem of triplicate values and these individual experiments are representative of a) and c) 6 separate experiments and b) and d) 3 separate experiments.

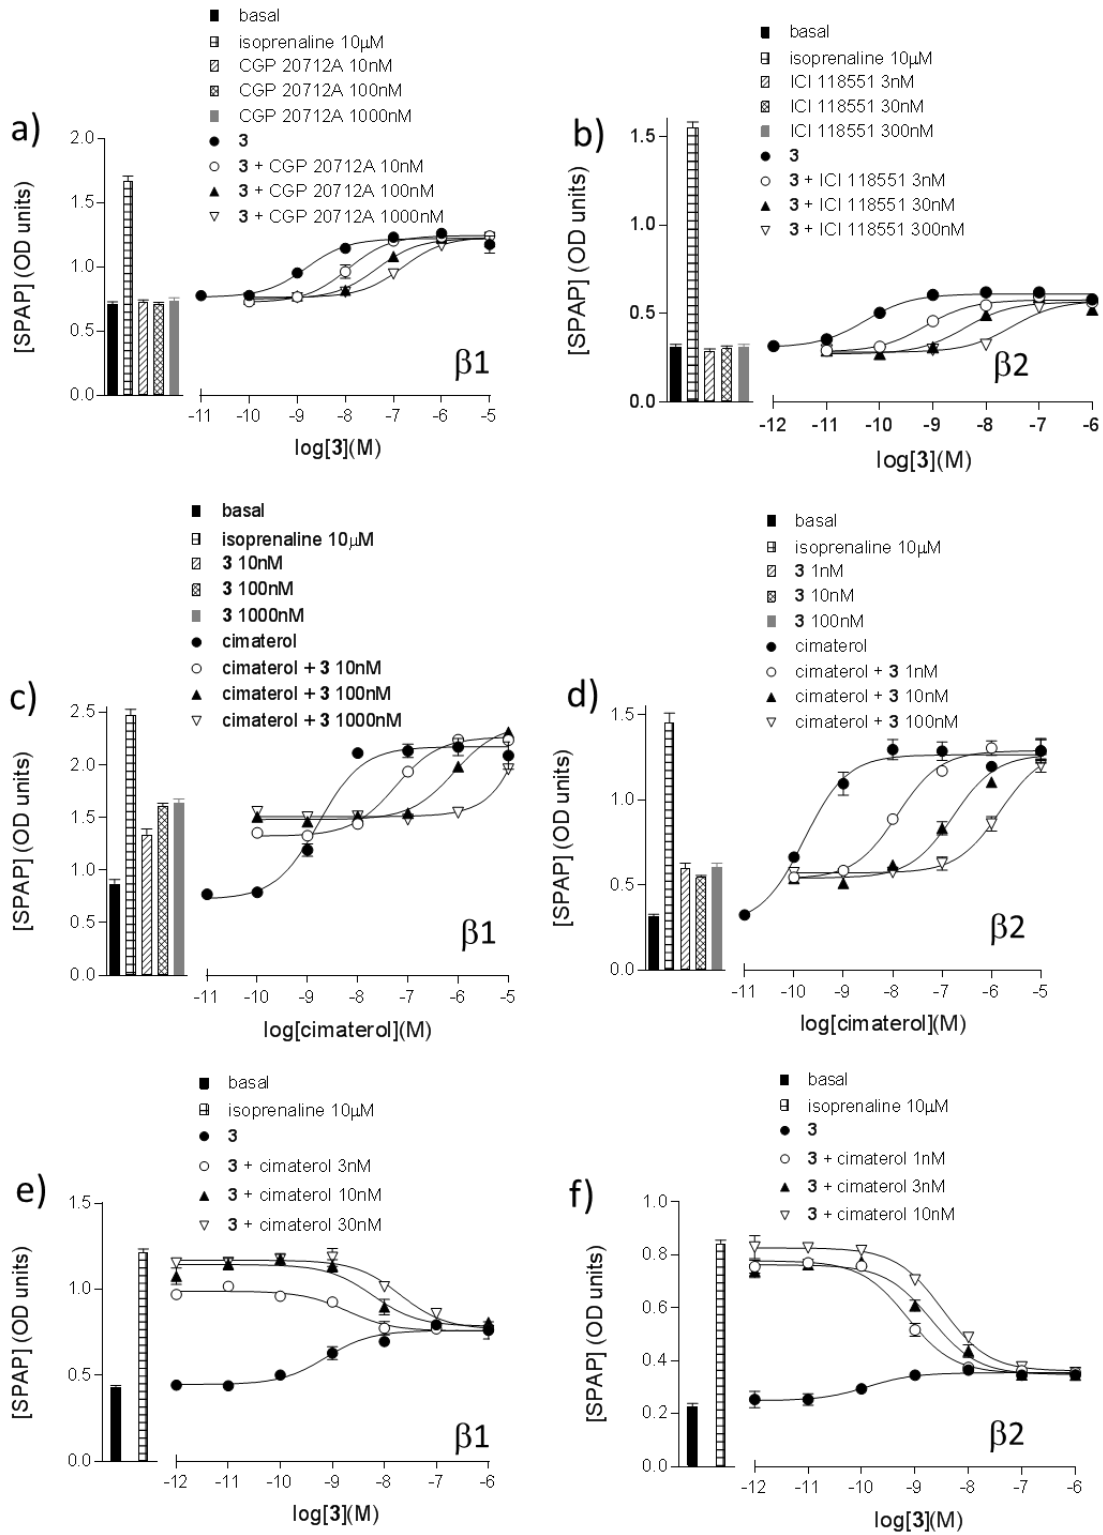

Figure S2: CRE-SPAP production in CHO- $\beta_1$  cells (a, c and e) and CHO- $\beta_2$  cells (b, d and f). a and b) show response to 3 inhibited by CGP20712A in the  $\beta_1$  cells and inhibited by ICI 118551 in the  $\beta_2$  cells thus confirming the responses are mediated via the respective receptors. c and d) show inhibition of the cimaterol response by increasing concentration of 3 in a manner consistent with that of a partial agonist; e and f) show inhibition of the cimaterol response by 3 in a manner consistent with competition at a single site. Bars represent basal CRE-SPAP production and that in response to 10  $\mu$ M isoprenaline or various concentrations of CGP 20712A, ICI 118551 or 3 alone. Data points are mean  $\pm$  sem of triplicate values and these individual experiments are representative of five or more separate experiments in each case.

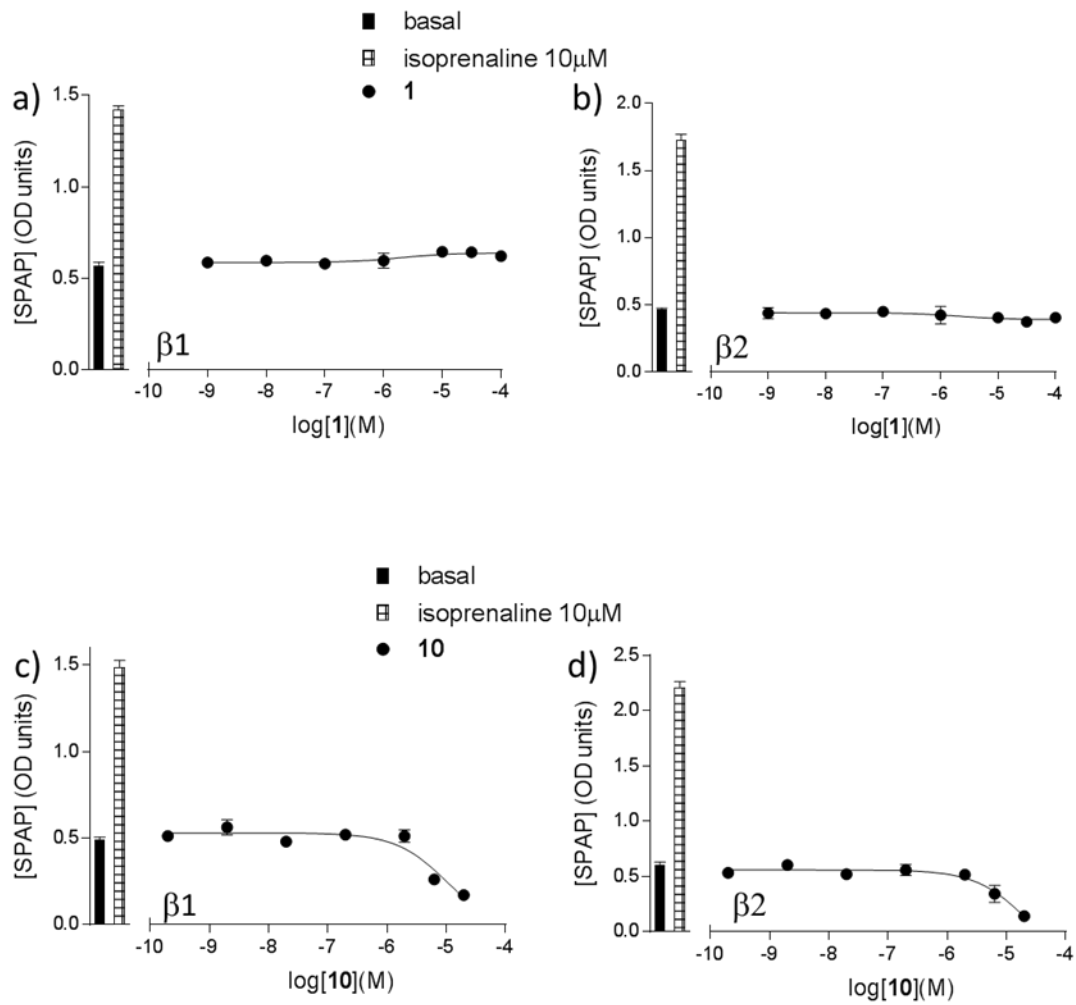

Figure S3: CRE-SPAP production in a) and c) in CHO-β<sub>1</sub> cells and b) and d) in CHO-β<sub>2</sub> cells in response to **1** (a and b) and **10** (c and d). Bars represent basal response and that to 10 μM isoprenaline. Data points are mean ± sem of triplicate determinations and these individual experiments are representative of 4 separate experiments in each case.

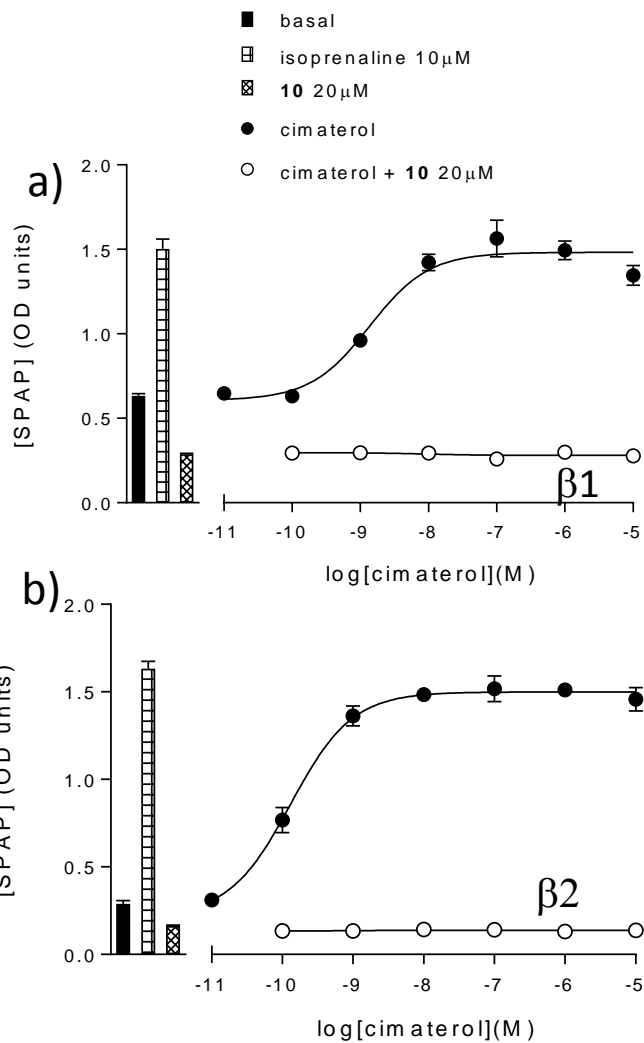

Figure S4: CRE-SPAP production in a) in CHO- $\beta_1$  cells and b) in CHO- $\beta_2$  cells in response to cimaterol in the presence and absence of 20 $\mu$ M **10**. Bars represent basal response and that in response to 10 $\mu$ M isoprenaline or 20 $\mu$ M **10** alone. Data points are mean  $\pm$  sem of triplicate determinations and are representative of three separate experiments in each case.

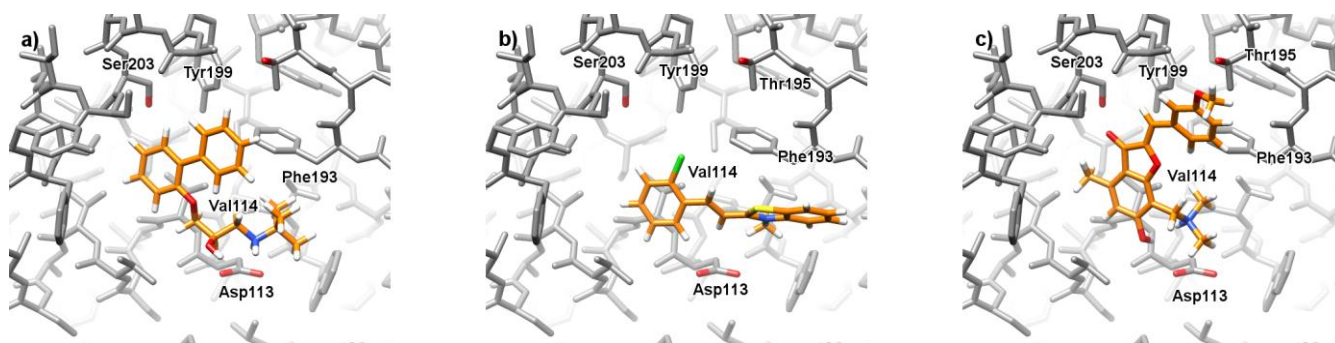

Figure S5: Docking poses for selected compounds. The  $\beta_2$ AR is shown in gray stick representation. Residues discussed in the text are labeled and shown with colored heteroatoms. Selected residues in TM6 and TM7 (including Phe289<sup>6.51</sup> and Phe290<sup>6.52</sup>) are hidden for clarity. Ligands are shown in orange stick representation. Perspective as in ref. (2) for comparability. (a) **3**, (b) **11**, (c) **7**.

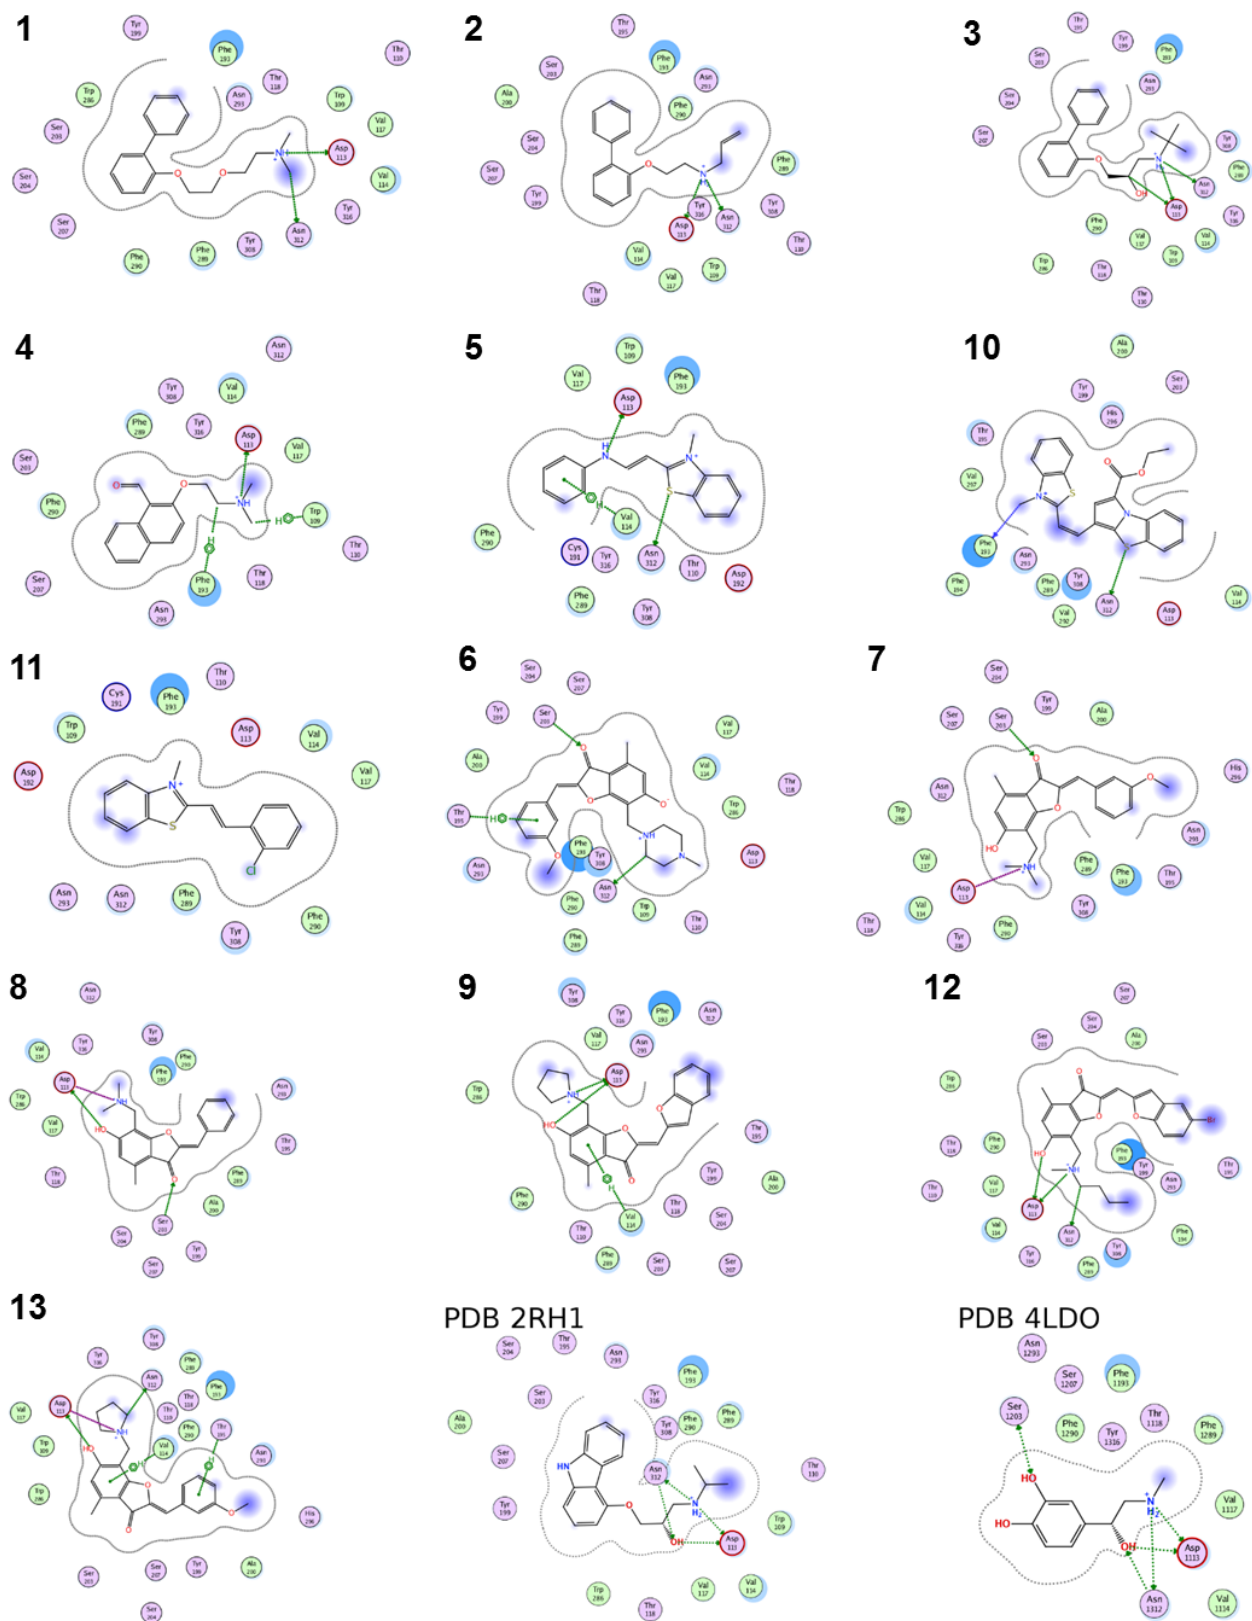

Figure S6: 2D binding mode depictions for all compounds for which binding has been correctly predicted (1,2,3,5,6,10,11,12,13,14,15,16,17). For comparison, the binding modes for Carazolol (PDB 2RH1) and adrenaline (PDB 4LDO) are shown. For new compounds, the depictions have been calculated based on binding mode predicted by docking. Depictions created using the Molecule Operating Environment (MOE). (10)



## SUPPLEMENTARY CHARTS

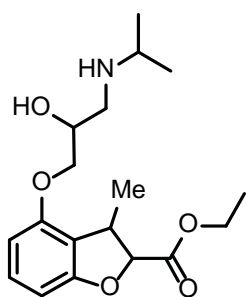

Q1

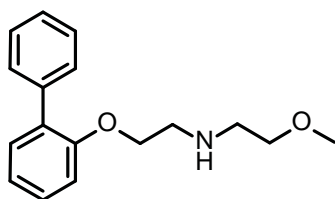

Q2

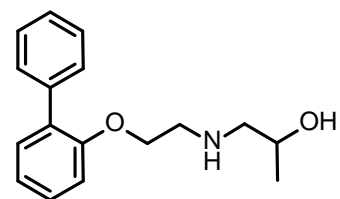

Q3

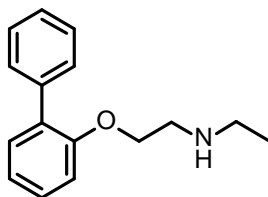

Q4

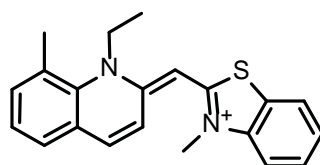

Q5

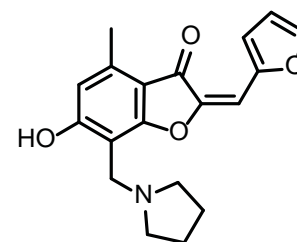

Q6

Chart S1: The six query molecules from ref. (2) used for similarity search and the derivation of eight substructures.

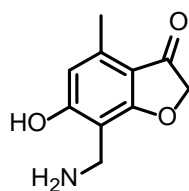

S1

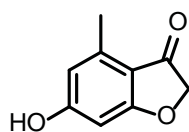

S2

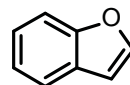

S3

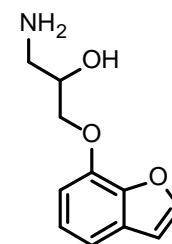

S4

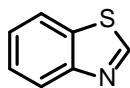

S5

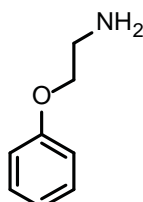

S6

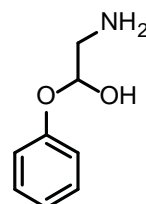

S7

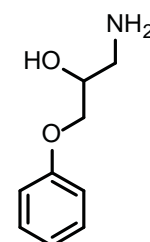

S8

Chart S2: The eight substructures, based on the ligands of ref. (2), used for screening in this study.

## SUPPLEMENTARY TABLES

Table S1: Number of molecules resulting from the similarity search with TC  $\geq 0.45$  for each query molecule of ref. (2). The sum reflects the number of molecules after removing duplicates.

| Query             | Q1   | Q2   | Q3  | Q4   | Q5   | Q6  | $\Sigma$ |
|-------------------|------|------|-----|------|------|-----|----------|
| N <sub>Hits</sub> | 1538 | 2381 | 946 | 1310 | 1053 | 284 | 6363     |

**Table S2: Affinity (pK<sub>D</sub> values) and β<sub>2</sub>-selectivity for compounds as measured by a parallel shift inhibition of cimaterol concentration responses in the CRE-SPAP assay in CHO-β<sub>1</sub> and CHO-β<sub>2</sub> cells. Values are mean ± sem of n separate experiments.**

| ID               | β <sub>2</sub> AR pK <sub>D</sub> |                    | n  | β <sub>1</sub> AR pK <sub>D</sub> |                    | n  | β <sub>2</sub> -selectivity <sup>a</sup> |
|------------------|-----------------------------------|--------------------|----|-----------------------------------|--------------------|----|------------------------------------------|
| 1 <sup>c</sup>   | 5.63                              | ±0.06              | 6  | 4.81                              | ±0.07              | 6  | 6.6                                      |
| 2 <sup>c</sup>   | 5.73                              | ±0.06              | 4  | 4.85                              | ±0.05              | 5  | 7.6                                      |
| 3 <sup>b,d</sup> | 10.74                             | ±0.03              | 14 | 9.19                              | ±0.04              | 10 | 35.5                                     |
| 4                | 4.98                              | ±0.05              | 6  | 4.62                              | ±0.08              | 4  | 2.3                                      |
| 5                | n.c.                              |                    | 8  | n.c.                              |                    | 4  |                                          |
| 6                | 5.30                              | ±0.07              | 4  | 5.01                              | ±0.06              | 6  | 1.9                                      |
| 7                | 5.30                              | ±0.06              | 4  | 5.02                              | ±0.07              | 6  | 1.9                                      |
| 8                | 5.06                              | ±0.04              | 4  | 5.17                              | ±0.12              | 7  | 0.78                                     |
| 9                | n.c.                              |                    | 6  | n.c.                              |                    | 6  |                                          |
| 10               | 6.62                              | ±0.12 <sup>e</sup> | 3  | n.c.                              |                    | 3  |                                          |
| 11               | n.c.                              |                    | 8  | n.c.                              |                    | 6  |                                          |
| 12               | n.c.                              |                    | 8  | n.c.                              |                    | 6  |                                          |
| 13               | 5.58                              | ±0.1               | 6  | 4.82                              | ±0.08 <sup>e</sup> | 5  | 5.8                                      |
| 14               | n.c.                              |                    | 4  | n.c.                              |                    | 4  |                                          |
| 15               | 4.13                              | ±0.06              | 6  | n.c.                              |                    | 4  |                                          |
| 16               | n.c.                              |                    | 8  | n.c.                              |                    | 4  |                                          |
| 17               | n.c.                              |                    | 6  | n.c.                              |                    | 4  |                                          |
| ICI 118551       | 9.81                              | ±0.15              | 5  | 7.16                              | ±0.07              | 6  | 447                                      |
| CGP 20712A       | 6.21                              | ±0.04              | 6  | 9.21                              | ±0.06              | 15 | 0.001                                    |

<sup>a</sup> Selectivity:  $\beta_1/\beta_2 = K_D(\beta_1)/K_D(\beta_2)$

<sup>b</sup> the partial agonist method of Stephenson 1956 was used to calculate the K<sub>D</sub> value for **3**.

<sup>c</sup> US 20090163545

<sup>d</sup> Antiarrhythmic pharmaceutical (Bipranol/Berlafenone), *Arzneimittel-Forschung* **1992**, *42*, 289-291

<sup>e</sup> estimated K<sub>D</sub>. Here a shift and a small reduction of the maximum response obtained when incubated with cimaterol rather than an absolute parallel shift was obtained e.g. Figure 2d. The shift was calculated from a parallel response of the lower part of the curve (as per the Gaddam equation) but noted here as an estimated K<sub>D</sub> given the slight fall in maximum.

**Table S3: Affinity (pK<sub>D</sub> values) for compounds as measured by [<sup>3</sup>H](-)CGP 12177 whole cell binding to CHO-β<sub>1</sub> and CHO-β<sub>2</sub> cells. Each compound was measured in n separate experiments.**

| ID | Structure | β <sub>2</sub> AR pK <sub>D</sub> | n | β <sub>1</sub> AR pK <sub>D</sub> | n |
|----|-----------|-----------------------------------|---|-----------------------------------|---|
| 14 |           | n.c.                              | 5 | n.c.                              | 5 |
| 15 |           | n.c.                              | 3 | n.c.                              | 3 |
| 16 |           | n.c.                              | 5 | n.c.                              | 5 |
| 17 |           | n.c.                              | 6 | n.c.                              | 6 |

n.c. For ligands with less than 50% inhibition of specific binding, the IC<sub>50</sub> value could not be determined and thus a K<sub>D</sub> value could not be calculated (n.c.)

**Table S4: pEC<sub>50</sub> values and % isoprenaline maximum values for cimaterol, 3 and CGP 12177 as agonists and log K<sub>D</sub> values for CGP 20712A and ICI 118551 as antagonists of these agonist response in the CHO-β<sub>1</sub> and CHO-β<sub>2</sub> cells respectively, as determined from CRE-SPAP production. Values are mean ± sem of n separate determinations.**

| Agonist   | pEC <sub>50</sub> | % isoprenaline maximum | n  | pK <sub>D</sub>   | n  |
|-----------|-------------------|------------------------|----|-------------------|----|
|           |                   |                        |    | β <sub>1</sub> AR |    |
|           |                   |                        |    | CGP 20712A        |    |
| cimaterol | 8.81 ± 0.02       | 104.7 ± 1.9            | 12 | 9.21 ± 0.06       | 15 |
| 3         | 8.80 ± 0.06       | 45.0 ± 2.0             | 11 | 8.35 ± 0.08       | 21 |
| CGP 12177 | 8.39 ± 0.03       | 86.8 ± 2.8             | 7  | 7.47 ± 0.04       | 14 |
|           |                   |                        |    | β <sub>2</sub> AR |    |
|           |                   |                        |    | ICI 118551        |    |
| cimaterol | 9.71 ± 0.02       | 94.9 ± 1.4             | 9  | 9.81 ± 0.15       | 5  |
| 3         | 9.94 ± 0.1        | 22.0 ± 2.1             | 8  | 9.56 ± 0.06       | 11 |

**Table S5: SMILES codes, vendor information and ZINC ID for described compounds**

| ID             | SMILES string                                                             | Vendor                   | Vendor ID    | ZINC ID  |
|----------------|---------------------------------------------------------------------------|--------------------------|--------------|----------|
| 1 <sup>b</sup> | <chem>CN(C)CCOCCOc1cccc1-c1cccc1</chem>                                   | Ambinter <sup>a</sup>    | Amb8591782   | 2825338  |
| 2 <sup>b</sup> | <chem>C=CCNCCOc1cccc1-c1cccc1</chem>                                      | Ambinter <sup>a</sup>    | Amb10982638  | 3001189  |
| 3 <sup>c</sup> | <chem>CC(C)(C)NCC(O)COc1cccc1-c1cccc1</chem>                              | Innovapharm <sup>b</sup> | STT-00320296 | 4353     |
| 4              | <chem>CN(C)CCOc1ccc2ccccc2c1C=O</chem>                                    | Otava <sup>c</sup>       | 7020663309   | 11992987 |
| 5              | <chem>C[n+]1c(C=CNc2cccc2)sc2cccc21</chem>                                | Enamine <sup>d</sup>     | T0504-1129   |          |
| 6              | <chem>COc1cccc(C=C2Oc3c(c(C)cc(O)c3CN3CCN(C)CC3)C2=O)c1</chem>            | IBS <sup>f</sup>         | STK854129    | 20573542 |
| 7              | <chem>COc1cccc(C=C2Oc3c(c(C)cc(O)c3CN(C)C)C2=O)c1</chem>                  | IBS <sup>f</sup>         | Amb807687    | 6764660  |
| 8              | <chem>Cc1cc(O)c(CN(C)C)c2c1C(=O)C(=Cc1cccc1)O2</chem>                     | IBS <sup>f</sup>         | Amb800928    | 6670218  |
| 9              | <chem>Cc1cc([O-])c(C[NH+]2CCCC2)c2c1C(=O)C(=Cc1cc3cccc3o1)O2</chem>       | Ambinter <sup>a</sup>    | Amb2448714   | 9575977  |
| 10             | <chem>CCOC(=O)c1cc(C=Cc2sc3cccc3[n+]2C)c2sc3cccc3n12</chem>               | Otava <sup>c</sup>       | 107910005    | 15222345 |
| 11             | <chem>C[n+]1c(C=Cc2cccc2Cl)sc2cccc21</chem>                               | Otava <sup>c</sup>       | 107910003    | 4158946  |
| 12             | <chem>CCCC[NH+](C)Cc1c2c(c(C)cc1[O-])C(=O)C(=Cc1cc3cc(Br)ccc3o1)O2</chem> | Ambinter <sup>a</sup>    | Amb2453954   | 9531929  |
| 13             | <chem>COc1cccc(C=C2Oc3c(c(C)cc(O)c3CN3CCCC3)C2=O)c1</chem>                | Ambinter <sup>a</sup>    | Amb804798    | 6759304  |
| 14             | <chem>CCOc1ccc(C=CC(=O)Nc2ccc3c(c2)N(CCN(C)C)C(=O)CO3)cc1OC</chem>        | Otava <sup>c</sup>       | 1082925      | 12082453 |
| 15             | <chem>C[n+]1c2cccc2sc1C1=C(N)N(c2cccc2)CC1=O</chem>                       | Ambinter <sup>a</sup>    | Amb471924    | 8394352  |
| 16             | <chem>Cc1n(-c2cccc2)c2ccc(Cl)cc2[n+]1CCO</chem>                           | Ambinter <sup>a</sup>    | Amb8495562   | 3127921  |
| 17             | <chem>COc1cccc1C(=O)C[n+]1c(C)n(C(F)F)c2cccc21</chem>                     | Timetec <sup>e</sup>     | ST51248084   | 5571431  |

<sup>a</sup> Ambinter c/o Greenpharma, 3, allée du titane 45100 Orléans, FRANCE

<sup>b</sup> Innovapharm Ltd., 42 Krasnotkatskaya Street, app. 111, Kiev - 02660, UKRAINE

<sup>c</sup> OTAVA Ltd., 400 Applewood Crescent, Unit 100, Vaughan, Ontario, L4K 0C3, CANADA

<sup>d</sup> SIA Enamine, Vestienas iela 2 B, V-1035 Riga, LATVIA

---

<sup>e</sup> TimTec LLC, 301-A Harmony Business Park, Newark, DE 19711, USA

<sup>f</sup> InterBioScreen Ltd., Institutsky Prospect, 7a, 142432 Chernogolovka, RUSSIA

**Table S6: Most similar molecules (ChEMBL ID and structure) for each compound by Tanimoto ECFP4 similarity at the time of the investigation**

| ID             | ChEMBL ID     | Structure                                                                            | Tanimoto ECFP4 |
|----------------|---------------|--------------------------------------------------------------------------------------|----------------|
| 1 <sup>a</sup> | CHEMBL1626224 | 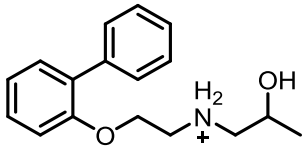   | 0.5870         |
| 2 <sup>a</sup> | CHEMBL1626224 |    | 0.7270         |
| 3 <sup>a</sup> | CHEMBL1626224 |    | 0.6220         |
| 4              | CHEMBL275742  |    | 0.3820         |
| 5              | CHEMBL1626224 |   | 0.3260         |
| 6              | CHEMBL2068762 |  | 0.3150         |
| 7              | CHEMBL1622248 |  | 0.2990         |
| 8              | CHEMBL1622248 |  | 0.3960         |



|    |             |  |        |
|----|-------------|--|--------|
| 16 | CHEMBL41113 |  | 0.2890 |
| 17 | CHEMBL631   |  | 0.3500 |

---

<sup>a</sup> Compounds are annotated in the latest ChEMBL version (ChEMBL 22)



## REFERENCES

1. Irwin, J. J.; Shoichet, B. K. ZINC - a free database of commercially available compounds for virtual screening. *J. Chem. Inf. Model.* **2005**, *45* (1), 177-182.
2. Kolb, P.; Rosenbaum, D. M.; Irwin, J. J.; Fung, J. J.; Kobilka, B. K.; Shoichet, B. K. Structure-based discovery of beta2-adrenergic receptor ligands. *Proc. Natl. Acad. Sci. U. S. A.* **2009**, *106* (16), 6843-6848.
3. Baker, J. G. The selectivity of  $\beta$ -adrenoceptor antagonists at the  $\beta_1$ ,  $\beta_2$  and  $\beta_3$  adrenoceptors. *Br. J. Pharmacol.* **2005**, *144*, 317-322.
4. Baker, J. G.; Proudman, R. G. W.; Hill, S. J. Identification of key residues in transmembrane 4 responsible for the secondary, low affinity conformation of the human  $\beta_1$ -adrenoceptor. *Mol. Pharmacol.* **2014**, *85*, 811-829.
5. Pak, M. D.; Fishman, P. H. Anomalous behaviour of CGP 12177A on  $\beta_1$ -adrenergic receptors. *J. Recept. Signal Transduction Res.* **1996**, *16*, 1-23.
6. Konkar, A. A.; Zhengxian, Z.; Granneman, J. G. Aryloxypropanolamine and catecholamine ligand interactions with the  $\beta_1$ -adrenergic receptor: evidence for interaction with distinct conformations of  $\beta_1$ -adrenergic receptors. *J. Pharmacol. Exp. Ther.* **2000**, *294*, 923-932.
7. Baker, J. G. Site of Action of  $\beta$ -Ligands at the Human  $\beta_1$ -Adrenoceptor. *J. Pharmacol. Exp. Ther.* **2005**, *313* (3), 1163-1171.
8. Kaumann, A. J.; Molenaar, P. The low-affinity site of the  $\beta_1$ -adrenoceptor and its relevance to cardiovascular pharmacology. *Pharmacol. Ther.* **2008**, *118*, 303-336.
9. Baker, J. G.; Hall, I. P.; Hill, S. J. Agonist and inverse agonist actions of " $\beta$ -blockers" at the human  $\beta_2$ -adrenoceptor provide evidence for agonist-directed signalling. *Mol. Pharmacol.* **2003**, *64*, 1357-1369.
10. Chemical Computing Group, Inc. Molecular Operating Environment (MOE) 2015.10. 1010 Sheerbrooke St. West, Suite #910, Montreal, QC, Canada, H3A 2R7, **2015**.
